# Supplementary material for: Magnesium Deficiency Questionnaire: A New Non-Invasive Magnesium Deficiency Screening Tool Developed Using Real-World Data from Four Observational Studies
Source: MDPI journal article supplement (doi:10.3390/nu12072062), 2020-07-11
Supplement: s1 [file s1]

**Supplementary Table S1.** Diagnostic utility of MDQ using serum magnesium level cut-off of 0.8 mmol/L.

|                                              | Pregnant women (N=765) |             |                    |             | Women with hormone-related conditions (N=8836) |             |                    |             |
|----------------------------------------------|------------------------|-------------|--------------------|-------------|------------------------------------------------|-------------|--------------------|-------------|
|                                              | MDQ-62 score $\geq 30$ |             | MDQ $\geq 51$      |             | MDQ $\geq 30$                                  |             | MDQ $\geq 51$      |             |
|                                              | Value                  | 95% CI      | Value              | 95% CI      | Value                                          | 95% CI      | Value              | 95% CI      |
| <b>Sensitivity</b>                           | 0.845                  | 0.815–0.872 | 0.283              | 0.248–0.320 | 0.884                                          | 0.874–0.893 | 0.248              | 0.236–0.260 |
| <b>Specificity</b>                           | 0.235                  | 0.165–0.316 | 0.864              | 0.793–0.917 | 0.616                                          | 0.601–0.631 | 0.938              | 0.930–0.945 |
| <b>Positive predictive value<sup>a</sup></b> | 0.841                  | 0.774–0.869 | 0.909              | 0.858–0.922 | 0.729                                          | 0.716–0.746 | 0.824              | 0.805–0.833 |
| <b>Negative predictive value<sup>a</sup></b> | 0.240                  | 0.203–0.323 | 0.201              | 0.174–0.305 | 0.820                                          | 0.806–0.829 | 0.517              | 0.500–0.549 |
| <b>Positive likelihood ratio</b>             | 1.105                  | 0.999–1.221 | 2.074              | 1.326–3.242 | 2.300                                          | 2.209–2.394 | 4.010              | 3.523–4.564 |
| <b>Negative likelihood ratio</b>             | 0.659                  | 0.461–0.943 | 0.830              | 0.764–0.903 | 0.189                                          | 0.174–0.205 | 0.802              | 0.787–0.816 |
| <b>AUROC</b>                                 | 0.630 <sup>b</sup>     | 0.581–0.679 | 0.630 <sup>b</sup> | 0.581–0.679 | 0.789 <sup>b</sup>                             | 0.780–0.799 | 0.789 <sup>b</sup> | 0.780–0.799 |

<sup>a</sup>Note that positive and negative predictive values are influenced by the prevalence of condition in the population that is being tested. <sup>b</sup>p-values for AUROC were  $p < 0.0001$ .

CI, confidence interval; MDQ, magnesium deficiency questionnaire.

**Supplementary Table S2.** Diagnostic utility of MDQ using serum magnesium level cut-off of 0.66 mmol/L.

|                                              | Pregnant women (N=765) |             |                    |             | Women with hormone-related conditions (N=8836) |             |                    |             |
|----------------------------------------------|------------------------|-------------|--------------------|-------------|------------------------------------------------|-------------|--------------------|-------------|
|                                              | MDQ≥30                 |             | MDQ≥51             |             | MDQ≥30                                         |             | MDQ≥51             |             |
|                                              | Value                  | 95% CI      | Value              | 95% CI      | Value                                          | 95% CI      | Value              | 95% CI      |
| <b>Sensitivity</b>                           | 0.887                  | 0.843–0.922 | 0.358              | 0.301–0.418 | 0.927                                          | 0.915–0.938 | 0.310              | 0.290–0.331 |
| <b>Specificity</b>                           | 0.200                  | 0.165–0.238 | 0.798              | 0.760–0.833 | 0.427                                          | 0.415–0.439 | 0.881              | 0.873–0.889 |
| <b>Positive predictive value<sup>a</sup></b> | 0.382                  | 0.329–0.482 | 0.497              | 0.442–0.560 | 0.321                                          | 0.311–0.360 | 0.433              | 0.415–0.457 |
| <b>Negative predictive value<sup>a</sup></b> | 0.760                  | 0.685–0.798 | 0.690              | 0.633–0.737 | 0.952                                          | 0.944–0.954 | 0.814              | 0.799–0.825 |
| <b>Positive likelihood ratio</b>             | 1.108                  | 1.042–1.178 | 1.774              | 1.400–2.248 | 1.617                                          | 1.579–1.656 | 2.615              | 2.385–2.866 |
| <b>Negative likelihood ratio</b>             | 0.567                  | 0.389–0.825 | 0.805              | 0.729–0.888 | 0.171                                          | 0.146–0.201 | 0.783              | 0.759–0.807 |
| <b>AUROC</b>                                 | 0.645 <sup>b</sup>     | 0.604–0.686 | 0.645 <sup>b</sup> | 0.604–0.686 | 0.741 <sup>b</sup>                             | 0.730–0.752 | 0.741 <sup>b</sup> | 0.730–0.752 |

<sup>a</sup>Note that positive and negative predictive values are influenced by the prevalence of condition in the population that is being tested. <sup>b</sup>p-values for AUROC were p<0.0001.

CI, confidence interval; MDQ, magnesium deficiency questionnaire.

**Supplementary Table S3.** Development of MDQ-23.

Questions included in the original MDQ-62 questionnaire were tested for contribution to the overall score in a regression model based on magnesium below 0.8 mmol/L (Yes/no). In MDQ-62, each question contributed 2–5 points to the overall score; a score of  $\geq 51$  points indicated a 'highly probable' magnesium deficiency. In MDQ-23, each selected question was assigned a new value of 1–4 points that contributed to the overall score; a score of  $>9$  points indicated magnesium deficiency.

| Question number in MDQ-62 | Question                                                                                                 | Question score in MDQ-62 | Regression coefficient | Standard error | p-value | Question score in MDQ-23 |
|---------------------------|----------------------------------------------------------------------------------------------------------|--------------------------|------------------------|----------------|---------|--------------------------|
| Q1                        | Excessive emotional stress                                                                               | 2                        | 0.424                  | 0.055          | <0.0001 | 2                        |
| Q2                        | Irritable, or easily provoked to anger                                                                   | 3                        | 0.492                  | 0.062          | <0.0001 | 2                        |
| Q3                        | Restless, or hyperactive                                                                                 | 2                        |                        |                |         | -                        |
| Q4                        | Easily startled by sound or light                                                                        | 4                        |                        |                |         | -                        |
| Q5                        | Insomnia                                                                                                 | 2                        | 0.302                  | 0.051          | <0.0001 | 1                        |
| Q6                        | Chronic headache or migraine                                                                             | 3                        |                        |                |         | -                        |
| Q7                        | Convulsions                                                                                              | 2                        | 0.324                  | 0.065          | <0.0001 | 2                        |
| Q8                        | Tremor or shakiness in the hands                                                                         | 3                        |                        |                |         | -                        |
| Q9                        | Fine, barely noticeable muscle twitching around your eyes, facial muscles, or other muscles of your body | 3                        | 0.311                  | 0.059          | <0.0001 | 1                        |
| Q10                       | Muscle spasms                                                                                            | 3                        |                        |                |         | -                        |

|     |                                                                                        |   |       |       |         |   |
|-----|----------------------------------------------------------------------------------------|---|-------|-------|---------|---|
| Q11 | Muscle spasms in hands or feet                                                         | 3 | 0.332 | 0.059 | <0.0001 | 2 |
| Q12 | Gag or choke from spasms in your oesophagus (food tube)                                | 4 | 0.503 | 0.088 | <0.0001 | 2 |
| Q13 | Asthma, shortbreathing, rales                                                          | 3 |       |       |         | - |
| Q14 | Emphysema, chronic bronchitis, or high respiratory rate (tachypnea)                    | 2 |       |       |         | - |
| Q15 | Osteoporosis                                                                           | 5 |       |       |         | - |
| Q16 | Kidney stone disease (urolithiasis)                                                    | 3 |       |       |         | - |
| Q17 | Chronic kidney disease                                                                 | 2 | 0.452 | 0.068 | <0.0001 | 2 |
| Q18 | Diabetes                                                                               | 4 |       |       |         | - |
| Q19 | Hyperfunction of the thyroid or parathyroid gland                                      | 3 |       |       |         | - |
| Q20 | High blood pressure                                                                    | 3 |       |       |         | - |
| Q21 | Mitral valve prolapse ('floppy heart valve')                                           | 4 | 0.824 | 0.139 | <0.0001 | 4 |
| Q22 | Tachycardia, irregular heartbeat or arrhythmia                                         | 3 |       |       |         | - |
| Q23 | Chronic bowel disease, ulcerative colitis, Crohn's disease or irritable bowel syndrome | 3 |       |       |         | - |
| Q24 | Frequent diarrhea or constipation                                                      | 3 | 0.513 | 0.079 | <0.0001 | 2 |
| Q25 | Suffer from premenstrual syndrome or menstrual cramps                                  | 3 |       |       |         | - |
| Q26 | Pregnant or recently pregnant                                                          | 2 |       |       |         | - |
| Q27 | Take Digitalis (Digoxin)                                                               | 3 |       |       |         | - |
| Q28 | Take any kind of diuretic                                                              | 5 | 0.284 | 0.052 | <0.0001 | 1 |

|     |                                                                  |   |       |       |         |   |
|-----|------------------------------------------------------------------|---|-------|-------|---------|---|
| Q29 | Recent radiation therapy or other type of radiation exposure     | 5 |       |       |         | - |
| Q30 | Have more than 7 alcohol drinks weekly                           | 4 | 0.277 | 0.051 | <0.0001 | 1 |
| Q31 | Problems with excessive alcohol intake                           | 3 |       |       |         | - |
| Q32 | Take more than 3 portions of caffeine-containing drinks daily    | 2 |       |       |         | - |
| Q33 | Consumption of sugar-containing products                         | 2 |       |       |         | - |
| Q34 | Crave carbohydrates and/or chocolate                             | 2 | 0.352 | 0.056 | <0.0001 | 2 |
| Q35 | Crave salt and/or salt products                                  | 2 |       |       |         | - |
| Q36 | Eat a high processed food/fast food diet                         | 2 |       |       |         | - |
| Q37 | Eat a diet low in green, leafy vegetables, seeds and fresh fruit | 2 | 0.257 | 0.056 | <0.0001 | 1 |
| Q38 | Eat a low protein diet                                           | 2 |       |       |         | - |
| Q39 | Presence of undigested food or fat in feces                      | 2 |       |       |         | - |
| Q40 | High blood pressure or pre-eclampsia in previous pregnancy       | 4 |       |       |         | - |
| Q41 | Chronic fatigue                                                  | 2 | 0.275 | 0.055 | <0.0001 | 1 |
| Q42 | Muscle weakness                                                  | 2 | 0.473 | 0.053 | <0.0001 | 2 |
| Q43 | Feeling of cold hands and/or feet                                | 2 |       |       |         | - |
| Q44 | Numbness in face, hands or feet                                  | 2 |       |       |         | - |
| Q45 | Persistent tingling in body                                      | 2 | 0.487 | 0.086 | <0.0001 | 2 |

|     |                                                                     |   |       |       |         |   |
|-----|---------------------------------------------------------------------|---|-------|-------|---------|---|
| Q46 | Feeling of chronic indifference or apathy                           | 2 |       |       |         | - |
| Q47 | Poor memory                                                         | 2 |       |       |         | - |
| Q48 | Loss of concentration                                               | 2 | 0.237 | 0.053 | <0.0001 | 1 |
| Q49 | Anxiety                                                             | 3 | 0.383 | 0.051 | <0.0001 | 2 |
| Q50 | Chronic depression for no apparent reason                           | 2 | 0.528 | 0.066 | <0.0001 | 2 |
| Q51 | Feelings of disorientation as to time or place                      | 2 |       |       |         | - |
| Q52 | Feeling depressed, lack of personal identity                        | 2 |       |       |         | - |
| Q53 | Hallucinations                                                      | 2 |       |       |         | - |
| Q54 | Feeling of persecution and hostility from others                    | 2 |       |       |         | - |
| Q55 | Pale and puffy face or poor, bad complexion                         | 2 |       |       |         | - |
| Q56 | Loss of considerable sexual energy or vitality                      | 2 | 0.368 | 0.052 | <0.0001 | 2 |
| Q57 | Been told by your attending doctor that your blood calcium is low   | 2 |       |       |         | - |
| Q58 | Been told by your attending doctor that your blood potassium is low | 3 |       |       |         | - |
| Q59 | Take calcium supplements regularly without magnesium                | 2 | 0.537 | 0.078 | <0.0001 | 3 |
| Q60 | Take iron or zinc supplements regularly without magnesium           | 2 |       |       |         | - |
| Q61 | Chronic fluoride intake                                             | 2 |       |       |         | - |

|     |                                                                                                                                          |   |       |       |         |   |
|-----|------------------------------------------------------------------------------------------------------------------------------------------|---|-------|-------|---------|---|
| Q62 | Frequently use antibiotics, steroids, oral contraceptives, indomethacin, cisplatin, amphotericin B, cholestyramine, synthetic oestrogens | 3 | 0.313 | 0.061 | <0.0001 | 1 |
|-----|------------------------------------------------------------------------------------------------------------------------------------------|---|-------|-------|---------|---|

MDQ, magnesium deficiency questionnaire.

**Supplementary Table S4.** Development of MDQ-10.

Questions included in the original MDQ-62 questionnaire were tested for contribution to the overall score in a regression model based on magnesium below 0.66 mmol/L (Yes/no). In MDQ-62, each question contributed 2–5 points to the overall score; a score of  $\geq 51$  points indicated a ‘highly probable’ magnesium deficiency. In MDQ-10, each selected question was assigned a new value of 1–4 points that contributed to the overall score; a score of  $>5$  points indicated magnesium deficiency.

| Question number in MDQ-62 | Question                                                                                                 | Question score in MDQ-62 | Regression coefficient | Standard error | p-value | Question score in MDQ-10 |
|---------------------------|----------------------------------------------------------------------------------------------------------|--------------------------|------------------------|----------------|---------|--------------------------|
| Q1                        | Excessive emotional stress                                                                               | 2                        | 0.554                  | 0.065          | <0.0001 | 3                        |
| Q2                        | Irritable, or easily provoked to anger                                                                   | 3                        | 0.684                  | 0.079          | <0.0001 | 3                        |
| Q3                        | Restless, or hyperactive                                                                                 | 2                        |                        |                |         | -                        |
| Q4                        | Easily startled by sounds or lights                                                                      | 4                        |                        |                |         | -                        |
| Q5                        | Insomnia                                                                                                 | 2                        | 0.552                  | 0.058          | <0.0001 | 3                        |
| Q6                        | Chronic headaches or migraines                                                                           | 3                        |                        |                |         | -                        |
| Q7                        | Convulsions                                                                                              | 2                        |                        |                |         | -                        |
| Q8                        | Tremor or shakiness in the hands                                                                         | 3                        |                        |                |         | -                        |
| Q9                        | Fine, barely noticeable muscle twitching around your eyes, facial muscles, or other muscles of your body | 3                        |                        |                |         | -                        |
| Q10                       | Muscle spasms                                                                                            | 3                        |                        |                |         | -                        |
| Q11                       | Muscle spasms in hands or feet                                                                           | 3                        |                        |                |         | -                        |



|     |                                                                                        |   |       |       |         |   |
|-----|----------------------------------------------------------------------------------------|---|-------|-------|---------|---|
| Q12 | Gag or choke from spasms in your oesophagus (food tube)                                | 4 |       |       |         | - |
| Q13 | Asthma, shortbreathing, rales                                                          | 3 |       |       |         | - |
| Q14 | Emphysema, chronic bronchitis, or high respiratory rate (tachypnea)                    | 2 |       |       |         | - |
| Q15 | Osteoporosis                                                                           | 5 |       |       |         | - |
| Q16 | Kidney stone disease (urolithiasis)                                                    | 3 | 0.543 | 0.103 | <0.0001 | 3 |
| Q17 | Chronic kidney disease                                                                 | 2 |       |       |         | - |
| Q18 | Diabetes                                                                               | 4 |       |       |         | - |
| Q19 | Hyperfunction of the thyroid or parathyroid gland                                      | 3 |       |       |         | - |
| Q20 | High blood pressure                                                                    | 3 |       |       |         | - |
| Q21 | Mitral valve prolapse ('floppy heart valve')                                           | 4 | 0.793 | 0.121 | <0.0001 | 4 |
| Q22 | Tachycardia, irregular heartbeat or arrhythmia                                         | 3 |       |       |         | - |
| Q23 | Chronic bowel disease, ulcerative colitis, Crohn's disease or irritable bowel syndrome | 3 |       |       |         | - |
| Q24 | Frequent diarrhea or constipation                                                      | 3 | 0.554 | 0.073 | <0.0001 | 3 |
| Q25 | Suffer from premenstrual syndrome or menstrual cramps                                  | 3 |       |       |         | - |
| Q26 | Pregnant or recently pregnant                                                          | 2 |       |       |         | - |
| Q27 | Take Digitalis (Digoxin)                                                               | 3 |       |       |         | - |
| Q28 | Take any kind of diuretic                                                              | 5 |       |       |         | - |

|     |                                                                  |   |       |       |         |   |
|-----|------------------------------------------------------------------|---|-------|-------|---------|---|
| Q29 | Recent radiation therapy or other type of radiation exposure     | 5 |       |       |         | - |
| Q30 | Have more than 7 alcohol drinks weekly                           | 4 |       |       |         | - |
| Q31 | Problems with excessive alcohol intake                           | 3 |       |       |         | - |
| Q32 | Take more than 3 portions of caffeine-containing drinks daily    | 2 |       |       |         | - |
| Q33 | Consumption of sugar-containing products                         | 2 |       |       |         | - |
| Q34 | Crave carbohydrates and/or chocolate                             | 2 |       |       |         | - |
| Q35 | Crave salt and/or salt products                                  | 2 |       |       |         | - |
| Q36 | Eat a high processed food/fast food diet                         | 2 |       |       |         | - |
| Q37 | Eat a diet low in green, leafy vegetables, seeds and fresh fruit | 2 |       |       |         | - |
| Q38 | Eat a low protein diet                                           | 2 |       |       |         | - |
| Q39 | Presence of undigested food or fat in feces                      | 2 |       |       |         | - |
| Q40 | High blood pressure or pre-eclampsia in previous pregnancy       | 4 |       |       |         | - |
| Q41 | Chronic fatigue                                                  | 2 |       |       |         | - |
| Q42 | Muscle weakness                                                  | 2 |       |       |         | - |
| Q43 | Feeling of cold hands and/or feet                                | 2 |       |       |         | - |
| Q44 | Numbness in face, hands or feet                                  | 2 |       |       |         | - |
| Q45 | Persistent tingling in body                                      | 2 | 0.571 | 0.076 | <0.0001 | 3 |

|     |                                                                     |   |       |       |         |   |
|-----|---------------------------------------------------------------------|---|-------|-------|---------|---|
| Q46 | Feeling of chronic indifference or apathy                           | 2 | 0.766 | 0.069 | <0.0001 | 4 |
| Q47 | Poor memory                                                         | 2 |       |       |         | - |
| Q48 | Loss of concentration                                               | 2 |       |       |         | - |
| Q49 | Anxiety                                                             | 3 |       |       |         | - |
| Q50 | Chronic depression for no apparent reason                           | 2 |       |       |         | - |
| Q51 | Feelings of disorientation as to time or place                      | 2 |       |       |         | - |
| Q52 | Feeling depressed, lack of personal identity                        | 2 |       |       |         | - |
| Q53 | Hallucinations                                                      | 2 |       |       |         | - |
| Q54 | Feeling of persecution and hostility from others                    | 2 |       |       |         | - |
| Q55 | Pale and puffy face or poor, bad complexion                         | 2 |       |       |         | - |
| Q56 | Loss of considerable sexual energy or vitality                      | 2 |       |       |         | - |
| Q57 | Been told by your attending doctor that your blood calcium is low   | 2 | 0.571 | 0.076 | <0.0001 | 3 |
| Q58 | Been told by your attending doctor that your blood potassium is low | 3 |       |       |         | - |
| Q59 | Take calcium supplements regularly without magnesium                | 2 | 0.766 | 0.069 | <0.0001 | 2 |
| Q60 | Take iron or zinc supplements regularly without magnesium           | 2 |       |       |         | - |
| Q61 | Chronic fluoride intake                                             | 2 |       |       |         | - |

|     |                                                                                                                                          |   |  |  |  |   |
|-----|------------------------------------------------------------------------------------------------------------------------------------------|---|--|--|--|---|
| Q62 | Frequently use antibiotics, steroids, oral contraceptives, indomethacin, cisplatin, amphotericin B, cholestyramine, synthetic oestrogens | 3 |  |  |  | - |
|-----|------------------------------------------------------------------------------------------------------------------------------------------|---|--|--|--|---|

MDQ, magnesium deficiency questionnaire.
